# Supplementary material
Source: MDPI journal article supplement (https://www.mdpi.com/2073-4441/13/4/538)
Supplement: s1 [file s1 › water-1103138-supplementary.pdf]

## Supplementary Materials

**Table 1.** Calibration of rainfall distribution uniformity in different rainfall intensity.

| Rainfall intensities<br>(mm/h) | Uniformity coefficient<br>(%) | Average<br>rain intensity (mm/h) |
|--------------------------------|-------------------------------|----------------------------------|
| 60                             | 86.17                         | 61.75                            |
| 90                             | 90.41                         | 91.51                            |
| 120                            | 85.74                         | 122.4                            |
| Average                        | 87.44                         |                                  |

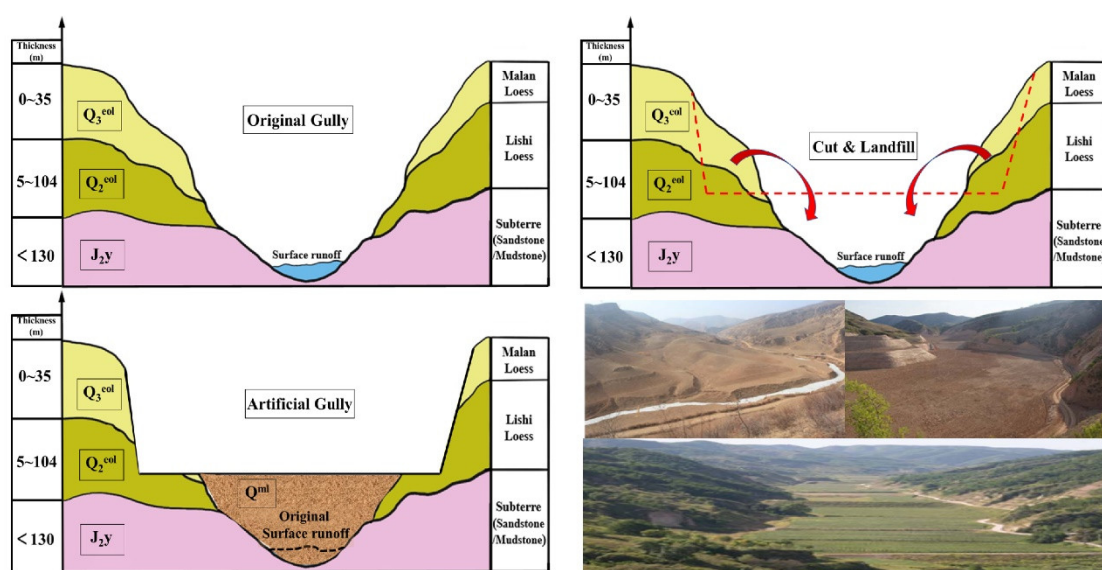

**Figure S1.** Primary process of GLC.

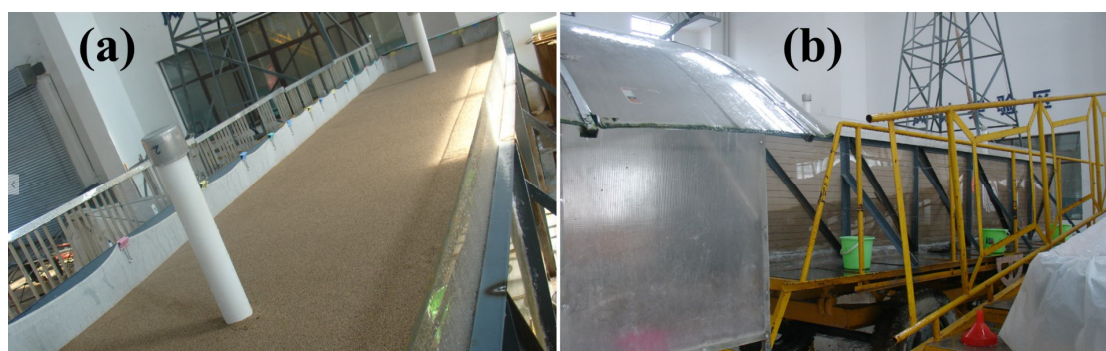

**Figure S2.** Pure coarse sand experiments. (a) Soil flume fill with pure coarse sand; (b) Performance testing.

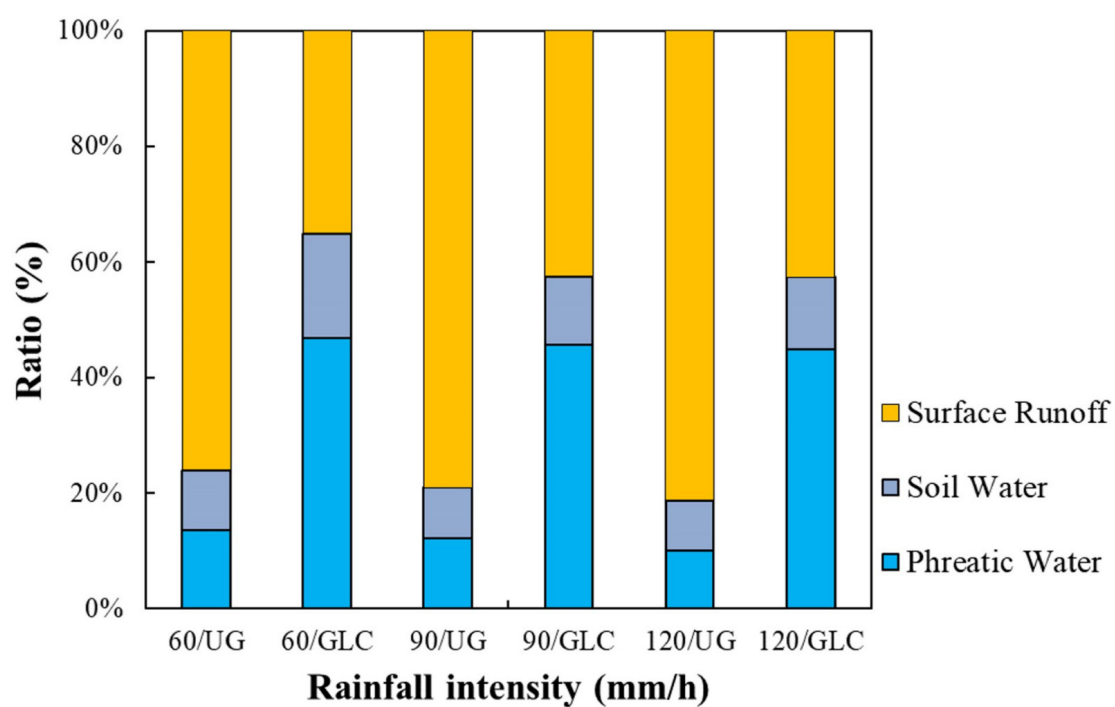

Figure S3. Water balance components ratio under different rainfall intensities.

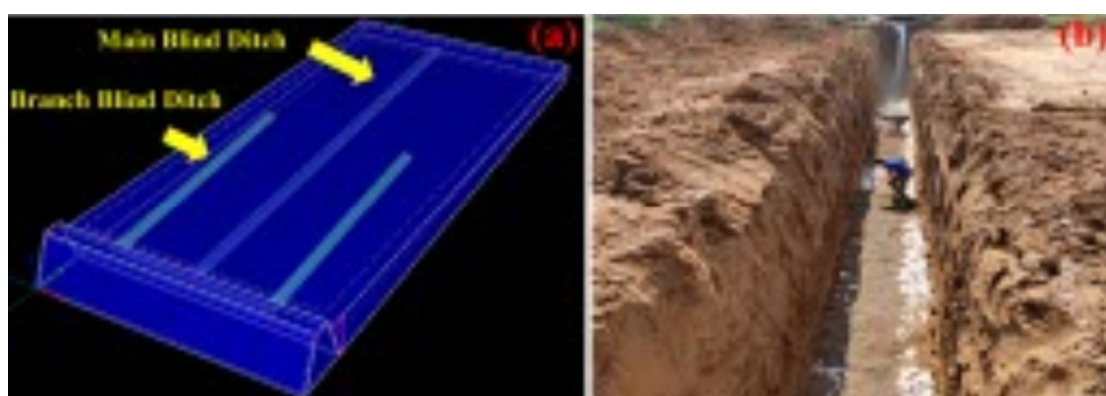

Figure S4. Field simulation and demonstration. (a) Simulation of GLC with the blind ditch in Yangjuangou sub-basin by HYDRUS-3D; (b) Demonstration of the blind ditch in Yangjuangou sub-basin.

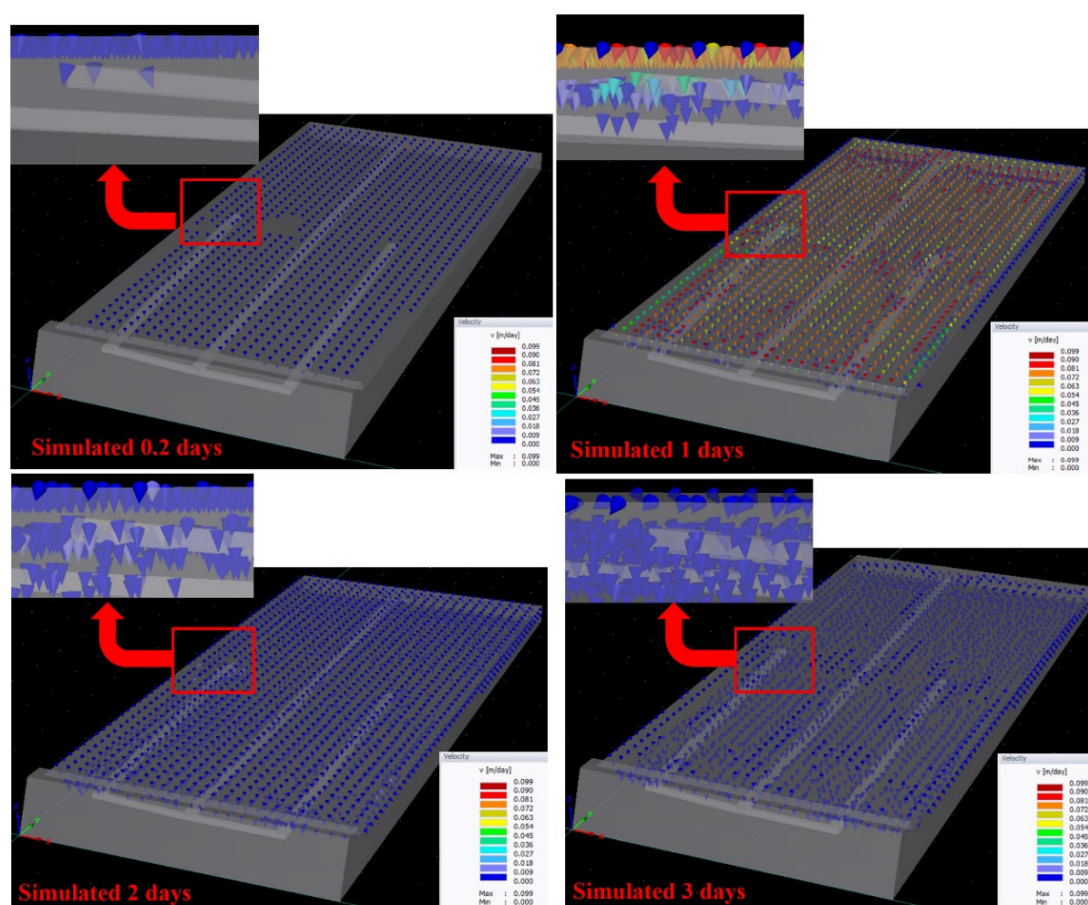

Figure S5. Compensation of water velocity vector in different simulation periods.

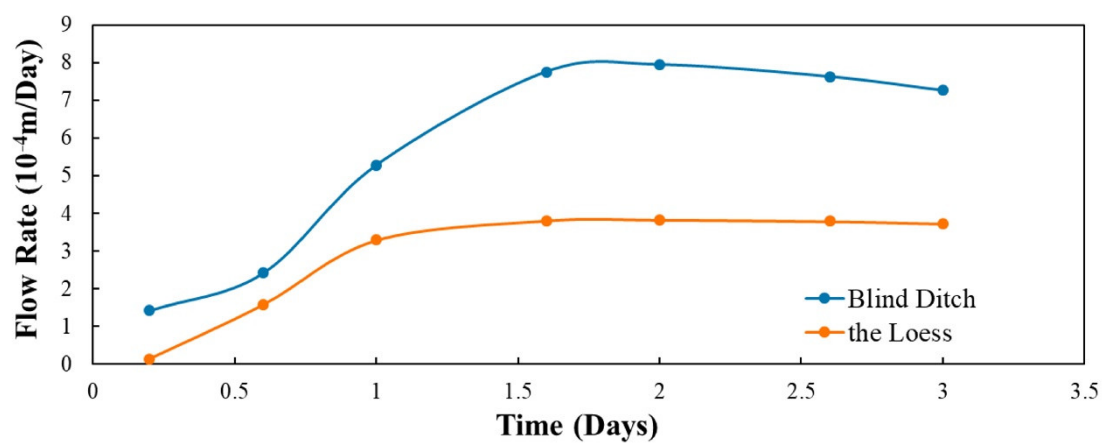

Figure S6. Flow rate at the junction of blind ditch and the loess.
